# Supplementary material for: Non-Alcoholic Fatty Liver Disease in Overweight Children: Role of Fructose Intake and Dietary Pattern
Source: Nutrients. 2018 Sep 19;10(9):1329. doi: 10.3390/nu10091329 (PMC6165138; doi:10.3390/nu10091329)
Supplement: Supplementary file 1 [file nutrients-10-01329-s001.pdf]

**Supplemental Table S1.** Nutritional intake of overweight children with NAFLD enrolled in the feasibility study at baseline.

|                                         | <b>NW</b> | <b>Control</b> | <b>Intervention</b> |
|-----------------------------------------|-----------|----------------|---------------------|
| <i>n</i>                                | 36        | 6              | 6                   |
| <b>Total energy intake (kcal/d)</b>     | 1900 ± 70 | 2125 ± 203     | 2166 ± 121          |
| <b>Total fat intake (g/d)</b>           | 78 ± 4    | 91 ± 10        | 87 ± 4              |
| <b>Total protein intake (g/d)</b>       | 59 ± 3    | 64 ± 6         | 31 ± 11             |
| <b>Total CHO intake (g/d)</b>           | 242 ± 10  | 255 ± 30       | 266 ± 24            |
| <b>Total fructose (g/d)<sup>‡</sup></b> | 55 ± 3    | 69 ± 13        | 54 ± 5              |
| <b>Total glucose (g/d)<sup>§</sup></b>  | 49 ± 2    | 62 ± 12        | 48 ± 5              |
| <b>Fiber intake (g/d)</b>               | 15 ± 1    | 22 ± 3         | 18 ± 3              |

Data are shown as absolute numbers or means ± SEM, NW: normal weight children. NW children were not included in the statistical analysis but are shown for comparison. <sup>‡</sup>free fructose and fructose deriving from sucrose, <sup>§</sup>free glucose and glucose deriving from sucrose. 'Under-reporters' were excluded from the analysis. Data of 'under-reporters' and children that dropped out of the study were excluded from the analysis.
